# Supplementary material for: Autophagy plays an important role in protecting Pacific oysters from OsHV-1 and Vibrio aestuarianus infections
Source: PubMed Central journal article supplement — Autophagy. 2015 Feb 25;11(3):516–26. doi: 10.1080/15548627.2015.1017188 (PMC4502751; doi:10.1080/15548627.2015.1017188), 2015-02-25
Supplement: kaup-11-03-1017188-s001.pdf [file kaup-11-03-1017188-s001.pdf]

Figure S1: NH4Cl effect on autophagy (WB and oyster survival)

A

WB: NH4CL 0; 0,5; 1 and 10mM

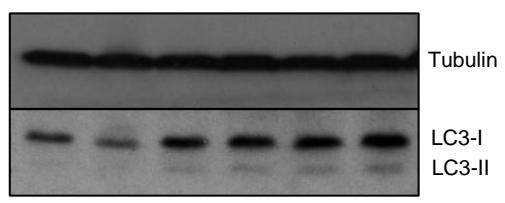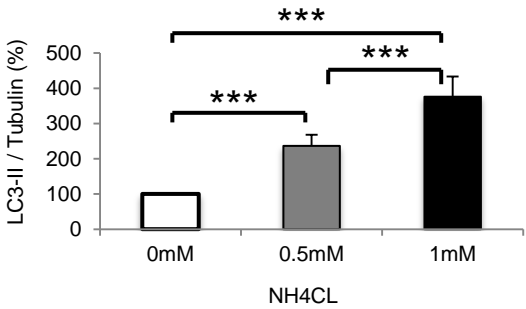

B

| NH4CL            | 0mM  | 0.5mM | 1mM  | 10mM |
|------------------|------|-------|------|------|
| Survival (Day 5) | 100% | 100%  | 100% | 0%   |
